# Supplementary material for: An ordered one-step colorimetric sensor for the selective determination of catechol based on the polyacrylic acid-coated cerium oxide with laccase-like activity
Source: Royal Society of Chemistry journal article supplement (doi:10.1039/d2nj04149a), 2022-01-01
Supplement: d2nj04149a1.pdf [file d2nj04149a1.pdf]

## **Electronic Supplementary Material (ESM)**

# **An ordered one-step colorimetric sensor for selective determination of catechol based on the polyacrylic acid-coated cerium oxide with laccase-like activity**

**Xiaoyan Jiang,<sup>‡</sup> Min Wang,<sup>‡</sup> Li Hou\* and Tianran Lin\***

School of Chemistry and Pharmaceutical Science, State Key Laboratory for the Chemistry and Molecular Engineering of Medicinal Resources, Guangxi Normal University, Guilin 541004, P. R. China.

Email: houli@mailbox.gxnu.edu.cn; tianranlin@163.com

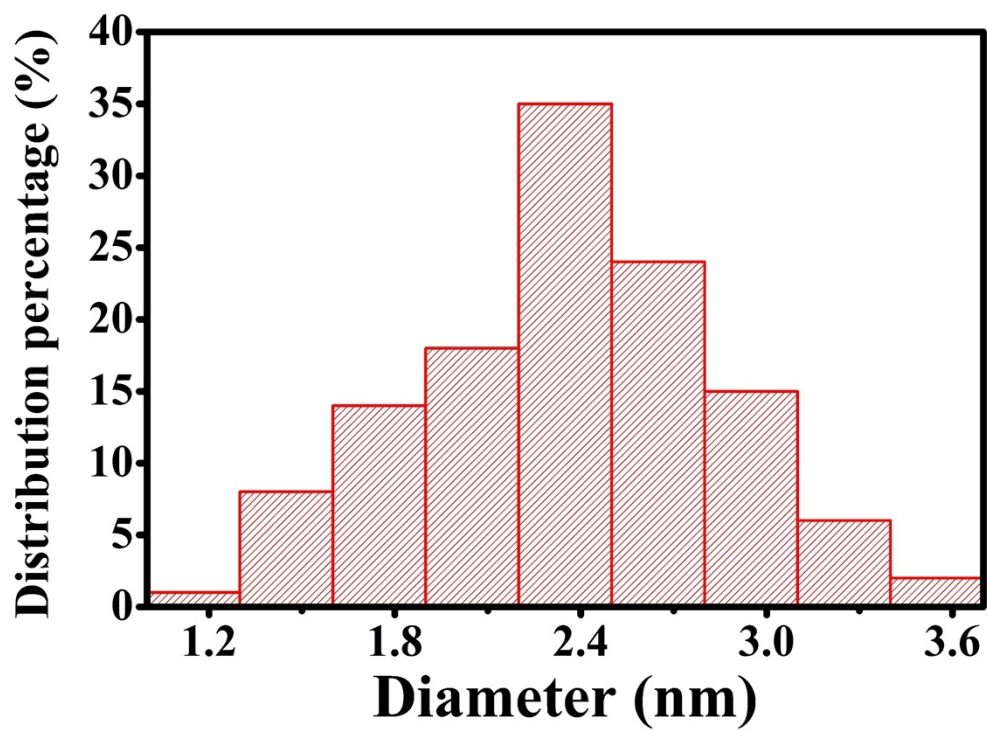

**Fig. S1** The Particle size histogram of PAA-CeO<sub>2</sub>.

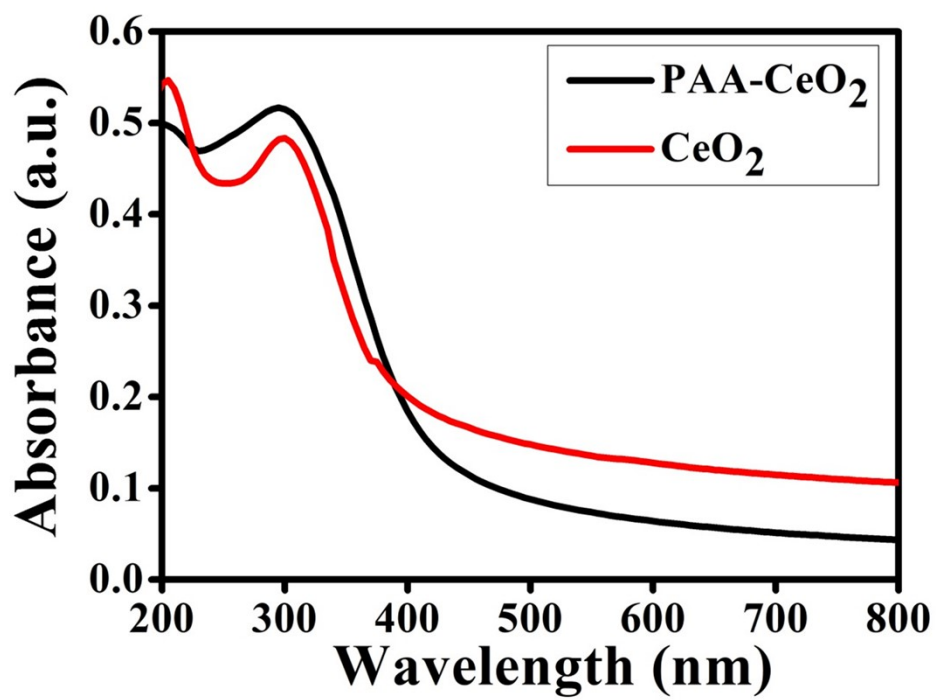

Fig. S2 The UV-Vis absorption spectra of PAA-CeO<sub>2</sub> and CeO<sub>2</sub>.

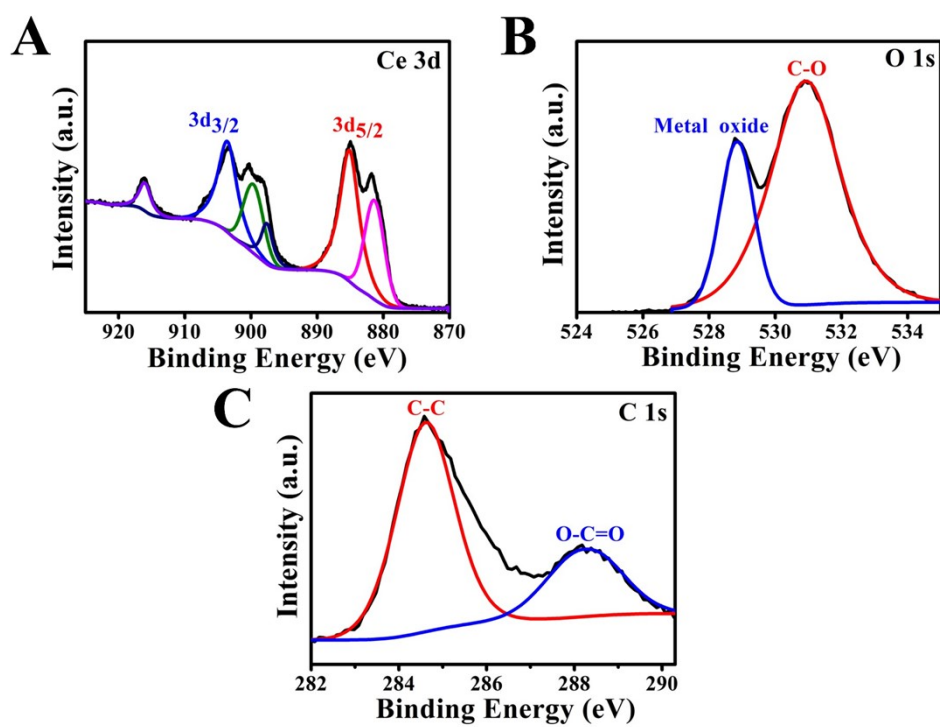

**Fig. S3** The high-resolution XPS spectra of PAA-CeO<sub>2</sub>, (A) Ce 3d, (B) O 1s, (C) C 1s.

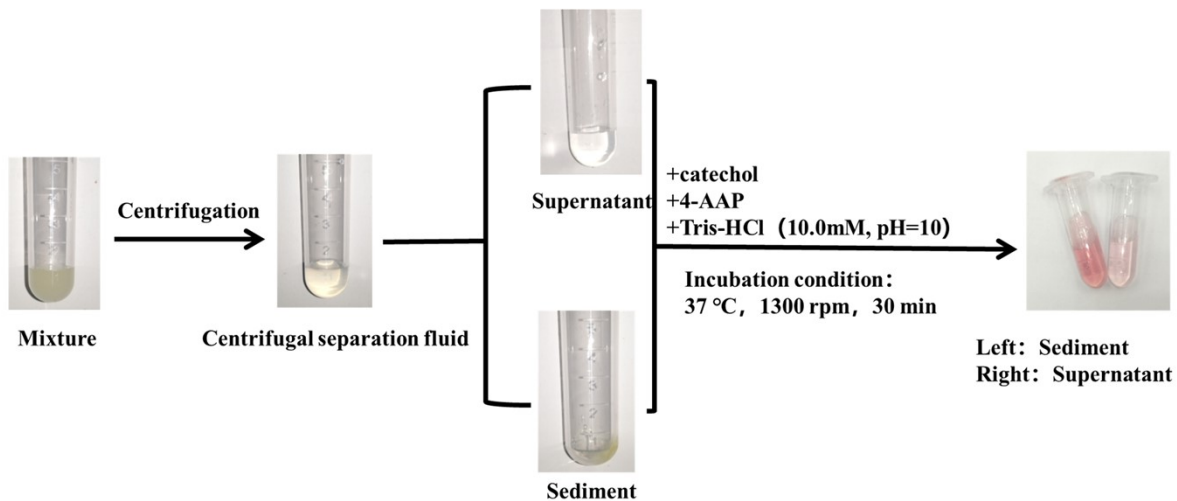

**Fig. S4** The verification of the laccase activity of PAA-CeO<sub>2</sub>.

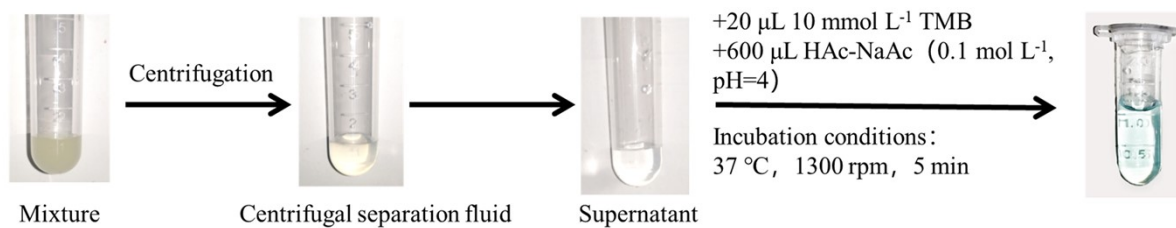

**Fig. S5** The color reaction of the chromogenic substrate TMB

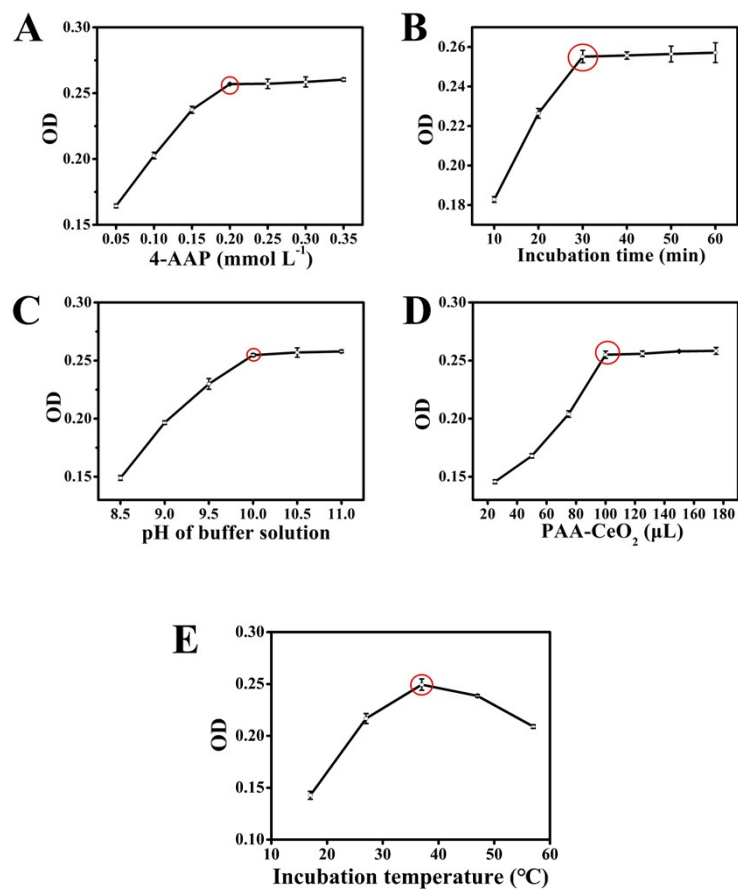

**Fig. S6** The effect of different experimental parameters on the OD intensity of catechol detection: (A) the concentration of 4-AAP, (B) the incubation time of system, (C) the pH of buffer solution, (D) the volume of PAA-CeO<sub>2</sub> solution, (E) incubation temperature (the concentration of catechol was 50 μmol L<sup>-1</sup> in all optimization experiments, error bar=SD, n=3)

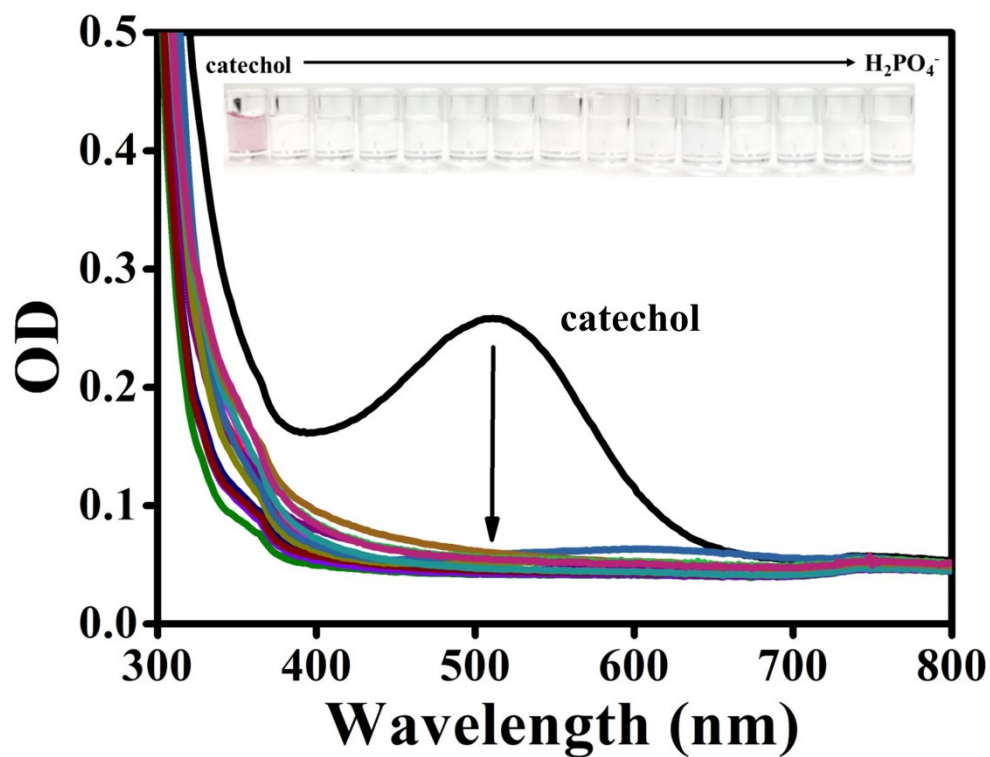

**Fig. S7** The UV-Vis absorption spectra and photographic images (inset) of the target substance and other interfering ions added.

**Table S1** Comparison with the previous methods for catechol detection

| Determination Method   | Materials                                                 | Linear range<br>( $\mu\text{mol L}^{-1}$ ) | LOD<br>( $\mu\text{mol L}^{-1}$ ) | Reference |
|------------------------|-----------------------------------------------------------|--------------------------------------------|-----------------------------------|-----------|
| Fluorescence sensor    | Si nanoparticles                                          | 0.06-40                                    | 0.02                              | 1         |
| Fluorescence sensor    | Fe-MIL-88NH <sub>2</sub>                                  | 0.13-5                                     | 0.091                             | 2         |
| Electrochemical sensor | MoS <sub>2</sub> nanoflower                               | 10 <sup>-6</sup> -1000                     | 10 <sup>-6</sup>                  | 3         |
| Electrochemical sensor | Ti <sub>3</sub> C <sub>2</sub> /MOF                       | 0.5-150                                    | 0.0031                            | 4         |
| Amperometric sensor    | iridium (IV) oxide                                        | 0.05-10.65                                 | 0.017                             | 5         |
| Colorimetric detection | graphitic carbon nitride-<br>copper hybrid<br>nanoflowers | 0-100                                      | 0.36                              | 6         |
| Colorimetric sensor    | TMB- MnO <sub>2</sub>                                     | 0.5-10                                     | 0.22                              | 7         |
| Colorimetric sensor    | N,S-C <sub>3</sub> O <sub>4</sub>                         | 2-15                                       | 0.31                              | 8         |
| Colorimetric sensor    | PAA-CeO <sub>2</sub>                                      | 0.5-50                                     | 0.121                             | This work |

**Table S2** Recovery results of catechol in tap water by visual sensing platform (n=3)

| sample    | Added ( $\mu\text{mol L}^{-1}$ ) | Found $\pm$ SD ( $\mu\text{mol L}^{-1}$ ) | Recovery (%) |
|-----------|----------------------------------|-------------------------------------------|--------------|
| tap water | 5                                | 4.77 $\pm$ 0.001                          | 95.40        |
|           | 50                               | 50.76 $\pm$ 0.002                         | 101.52       |



## References

- 1 S. Nsanzamahoro, F. P. Mutuyimana, Y. Han, S. Ma, M. Na, J. Liu, Y. Ma, C. Ren, H. Chen and X. Chen, *Sens. Actuators, B*, 2019, **281**, 849-856.
- 2 L. Hou, Y. Qin, T. Lin, Y. Sun, F. Ye and S. Zhao, *Sens. Actuators, B*, 2020, **321**.
- 3 J. S. A. Nair, S. S and K. Y. Sandhya, *Analyst*, 2022, **147**, 2966-2979.
- 4 R. Huang, D. Liao, S. Chen, J. Yu and X. Jiang, *Sens. Actuators, B*, 2020, **320**.
- 5 C. Erkmen, S. Kurbanoglu and B. Uslu, *Sens. Actuators, B*, 2020, **316**.
- 6 T. V. Dang, N. S. Heo, H. J. Cho, S. M. Lee, M. Y. Song, H. J. Kim and M. I. Kim, *Mikrochim Acta*, 2021, **188**, 293.
- 7 P. Xiao, Y. Liu, W. Zong, J. Wang, M. Wu, J. Zhan, X. Yi, L. Liu and H. Zhou, *RSC Adv*, 2020, **10**, 6801-6806.
- 8 X. Liu, X. Cao, S. Zhao, Z. Liu, G. Lu and Q. Liu, *Anal Methods*, 2021, **13**, 5377-5382.
